# Supplementary material for: Tailoring magnetic resonance imaging relaxivities in macroporous Prussian blue cubes
Source: Royal Society of Chemistry journal article supplement (doi:10.1039/c9dt02414j), 2019-01-01
Supplement: c9dt02414j1.pdf [file c9dt02414j1.pdf]

## Supplementary Information

### **Tailoring magnetic resonance imaging relaxivities in macroporous Prussian blue cubes**

*Wenlan Guan, Ji Ma, Xi Peng and Kezheng Chen\**

Lab of Functional and Biomedical Nanomaterials, College of  
Materials Science and Engineering, Qingdao University of  
Science and Technology, Qingdao 266042, China.

\* To whom correspondence should be addressed. Tel: +86-532-84022509. Fax: +86-  
532-84022509. E-Mail: [kchen@qust.edu.cn](mailto:kchen@qust.edu.cn)

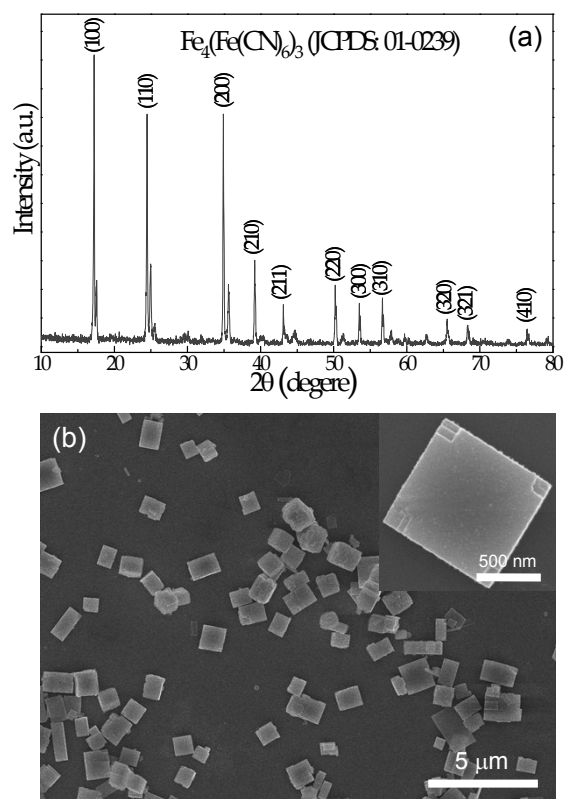

Figure S1. (a) PXRD pattern and (b) FESEM image of the as-synthesized product prior to acid etching. A zoom-in image of a single particle is shown as an inset in panel (b).

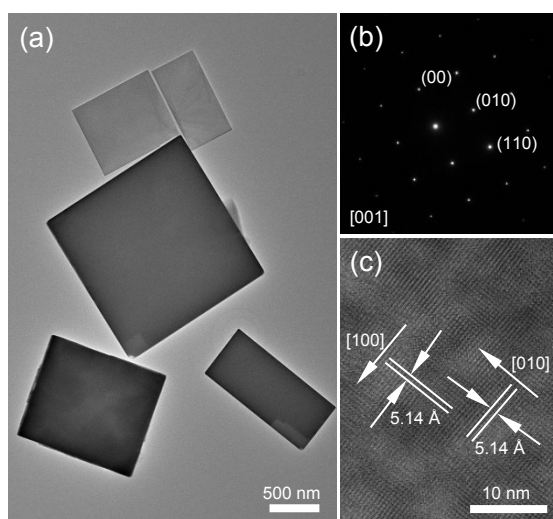

Figure S2. (a) TEM image, (b) SAED pattern and (c) HRTEM image of the as-synthesized product prior to acid etching.

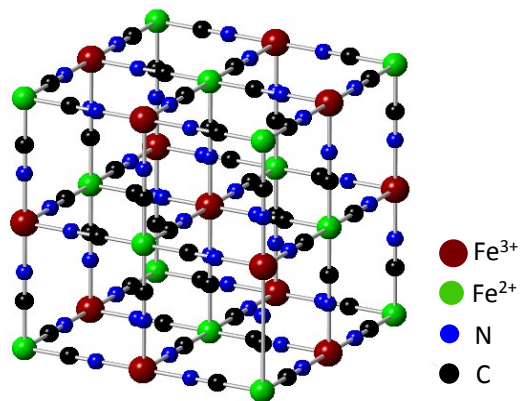

Figure S3. The unit-cell crystal structure of Prussian blue.

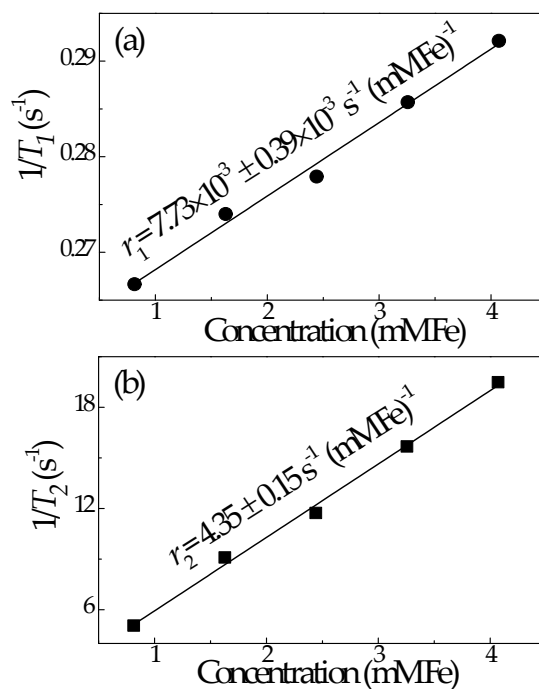

Figure S4. Plots of (a)  $1/T_1$  and (b)  $1/T_2$  versus iron concentrations for the as-synthesized product after acid etching treatment with 0 M.

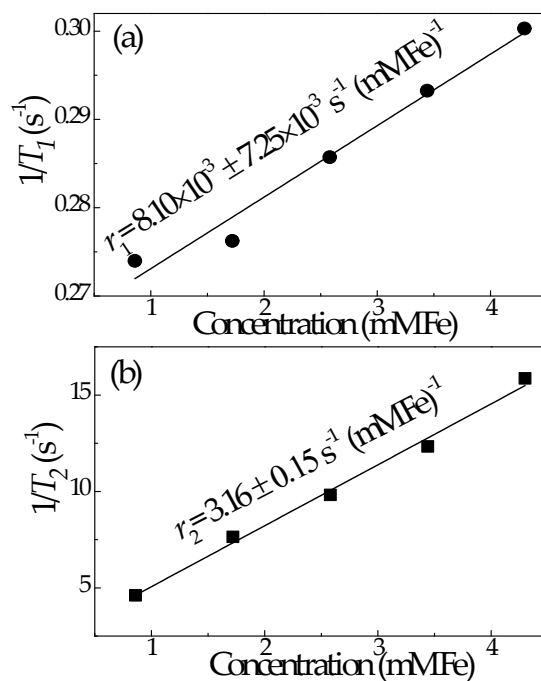

Figure S5. Plots of (a)  $1/T_1$  and (b)  $1/T_2$  versus iron concentrations for the as-synthesized product after acid etching treatment with 0.5 M.

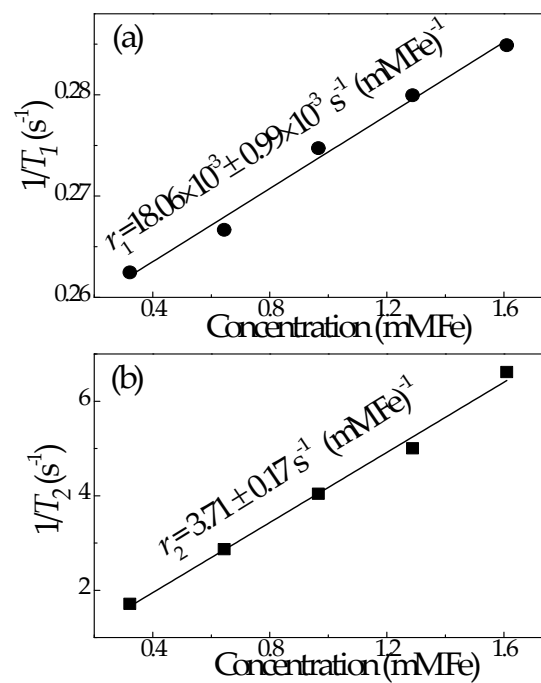

Figure S6. Plots of (a)  $1/T_1$  and (b)  $1/T_2$  versus iron concentrations for the as-synthesized product after acid etching treatment with 1.5 M.

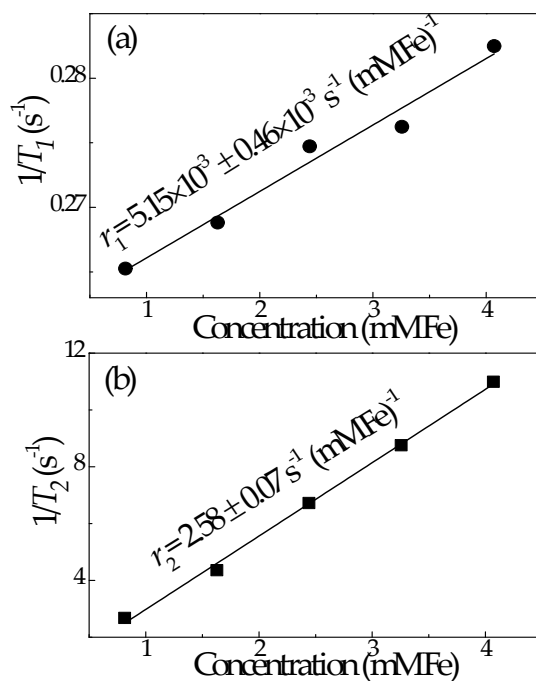

Figure S7. Plots of (a)  $1/T_1$  and (b)  $1/T_2$  versus iron concentrations for the as-synthesized product after acid etching treatment with 2 M.

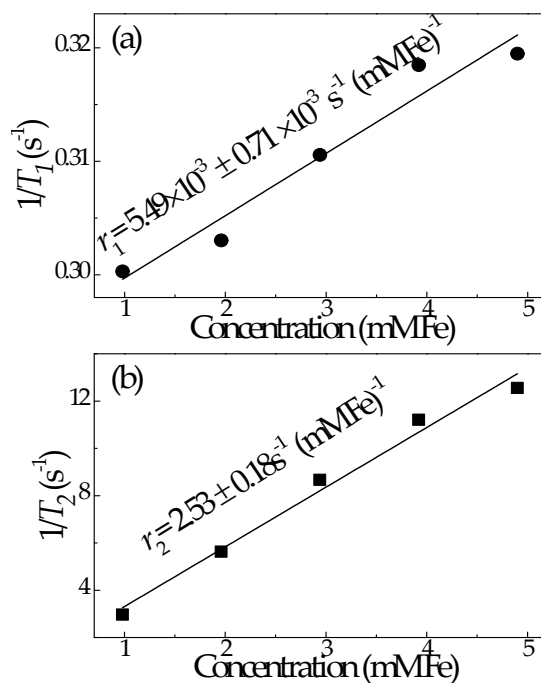

Figure S8. Plots of (a)  $1/T_1$  and (b)  $1/T_2$  versus iron concentrations for the as-synthesized product after acid etching treatment with 2.5 M.
